# Supplementary material
Source: publisher figshare collection journal article supplement (https://acs.figshare.com/ndownloader/files/4920880)
Supplement: Supplementary file 1 [file 4920880]

**Supporting information**

**Highly Efficient Sky-Blue Fluorescent Organic  
Light Emitting Diode Based on Mixed Cohost  
System for Thermally Activated Delayed  
Fluorescence Emitter (2CzPN)**

Jin Won Sun, Kwon-Hyeon Kim, Chang-Ki Moon, Jeong-Hwan Lee, Jang-Joo Kim\*

Department of Materials Science and Engineering, Research Institute of Advanced Materials,  
Seoul National University, 151-744, Seoul, South Korea, E-mail:jjkim@snu.ac.kr

# 1. PL spectra of 2CzPN in the various host materials

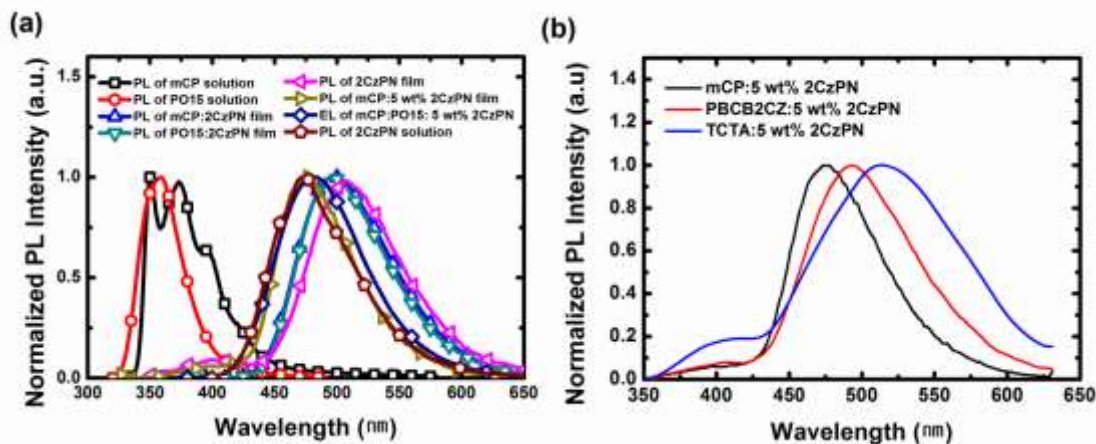

Figure S1.(a) The film PL spectra of mCP, PO15, 2CzPN, 50 wt% mCP: 50 wt% 2CzPN, 50 wt% PO15 : 50 wt% 2CzPN, and mCP:5 wt% 2CzPN, and the EL spectrum of the blue OLED. (b) PL spectra of mCP:5 wt% 2CzPN, PBCB2CZ:5 wt% 2CzPN, and TCTA:5 wt% 2CzPN. The film PL spectra were measured using 50 nm thick films deposited on precleaned fused silica substrates. Monochromatic light with the wavelength of 250 nm~330 nm, considering 2<sup>nd</sup> harmonic, from a Xenon lamp was used as the excitation source and a photomultiplier tube as the detector. With the selection of different hosts for 2CzPN, the PL spectra were different from solvatochromic effect due to CT characteristics of the TADF material.

## 2. Comparison of the horizontal transition dipole ratios

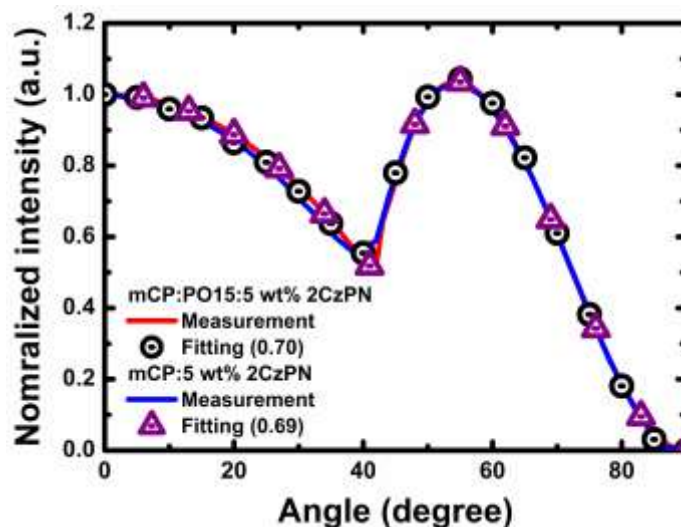

Figure S2. Angle-dependent PL intensities of the *p*-polarized light from a 30-nm-thick films of mCP:PO15:5 wt% 2CzPN and mCP:5 wt% 2CzPN. Solid line represents the theoretical fit to the experimental data with the horizontal transition dipole ratio of 0.70 and 0.69 for mCP:PO15:5 wt% 2CzPN and mCP:5 wt% 2CzPN, respectively. A continuous wave diode laser (405 nm, Edmund optics Inc.) was used as the excitation source and the incident angle of the excitation light was fixed at 45° from the plane normal direction of substrate and the *p*-polarized emitted light was detected at 480 nm.

### 3. Device performance

**Table S1. Voltage, current efficiency, current density, EQE, and power efficiency of the OLED**

|                                       | Turn on <sup>+</sup> /Max. <sup>⊥</sup> | 1,000 cd/m <sup>2</sup> | 2,000 cd/m <sup>2</sup> |
|---------------------------------------|-----------------------------------------|-------------------------|-------------------------|
| Voltage [V]                           | 3 <sup>+</sup>                          | 6.4                     | 7.6                     |
| Current Density [mA/cm <sup>2</sup> ] | 5.7×10 <sup>-3+</sup>                   | 22                      | 60                      |
| Current Efficiency [cd/A]             | 45.3 <sup>⊥</sup>                       | 5.5                     | 3                       |
| EQE [%]                               | 21.8 <sup>⊥</sup>                       | 2.8                     | 1.6                     |
| Power Efficiency [lm/W]               | 47.4 <sup>⊥</sup>                       | 3                       | 1.4                     |
